punctures, use of positive-pressure breathing following an attempted block, and familiarity with the anatomic landmarks (such as the interscalene groove). While Moore<sup>1</sup> stated an incidence of 0.5 to 4 per cent, Brand<sup>2</sup> reported an incidence of 6.1 per cent. It has been claimed that the classic interscalene approach of Winnie<sup>3,4</sup> offers the least chance of producing pneumothorax. The single-injection subclavian perivascular approach can produce pneumothorax, though the incidence is very low.

To our knowledge, hemopneumothorax following brachial block in heparinized patients has not been reported. Spontaneous hemopneumothorax in patients undergoing heparin therapy for thromboembolic disease has been reported.<sup>5-7</sup> In most of these cases the primary disease was pulmonary infarction. The presumed mechanism in these instances was either rupture of the hemorrhagic infarction into the pleural cavity or spontaneous bleeding from the pleural membrane. In these cases the onset was delayed, and all had hemothorax that was not associated with pneumothorax. In the case presented, the onset was relatively acute following brachial block and heparin therapy. The clinical manifestations occurring on the third day indicated either slow leakage of blood into the pleural cavity or dislodgement of clot and sudden hemorrhage subsequent to the puncture of lung tissue and the continued heparin therapy, respectively. Though it could have been a spontaneous hemopneumothorax following anticoagulant therapy, the fact that it occurred on the same side as the brachial block, and the retrospective review of the routine immediate postoperative chest x-ray showing a 10 per cent pneumothorax, substantiate the cause of the hemopneumothorax in this patient as injury to the lung during brachial block. Anatomically, injury to the pleura and lung on the left

side is less likely because the left pleural dome is at a lower level in the neck compared with that on the right.

The normal platelet count in the postoperative period rules out the possibility that this bleeding was due to either idiopathic thrombocytopenia or heparin-induced immune thrombocytopenia.<sup>8</sup> The prolonged partial thromboplastin time indicates that the bleeding was due to the anticoagulant therapy. Most patients who have had hemothorax subsequent to pulmonary embolism have had some permanent sequelae. Many of these patients have had to undergo further surgical procedures such as decortication, whereas our patient did not.

The purpose of reporting this case is not to discourage the relatively safe technique of brachial block. It is to alert anesthesiologists to the rare possibility of development of this complication in patients heparinized during or after operation.

#### REFERENCES

1. Moore DC: Regional Block. Springfield, Ill., Charles C Thomas, 1969, pp 237-240
2. Brand L, Papper EM: A comparison of supraclavicular and axillary techniques for brachial plexus blocks. *ANESTHESIOLOGY* 22:226-229, 1961
3. Winnie AP, Collins VJ: The subclavian perivascular technique of brachial plexus anesthesia. *ANESTHESIOLOGY* 25:353-363, 1964
4. Winnie AP: Interscalene brachial plexus block. *Anesth Analg (Cleve)* 49:455-466, 1970
5. Millard CE: Massive hemothorax complicating heparin therapy for pulmonary infarction. *Chest* 59:235-237, 1971
6. Hamaker WR, Buchman RJ: Hemothorax—a complication of anticoagulant therapy. *Ann Thorac Surg* 8:564-569, 1969
7. Diamond MT, Fell SC: Anticoagulant-induced massive hemothorax. *NY State J Med* 73:691-692, 1973
8. Babcock RB, Dumper CW, Scharfman WB: Heparin-induced immune thrombocytopenia. *N Eng J Med* 295:237-241, 1976

Anesthesiology  
48:214-219, 1978

## Cerebrospinal Fluid Pressure and Subarachnoid Gas Composition during Nitrous Oxide Anesthesia for Gas Myelography

YUPADI PRASERTWANITCH, M.D.,\* AND RONALD A. GABEL, M.D.†

During gas myelography, a bubble of O<sub>2</sub> is introduced into the subarachnoid space to outline

\* Clinical Fellow in Anaesthesia, Harvard Medical School. Present address: St. Joseph Hospital, 215 West 4th Street, Mishawaka, Indiana 46544.

† Assistant Professor of Anaesthesia, Harvard Medical School.

Received from the Departments of Anesthesia, Peter Bent Brigham Hospital and Harvard Medical School, Boston, Massachusetts 02115. Accepted for publication August 31, 1977.

Address reprint requests to Dr. Gabel: Department of Anesthesia, Peter Bent Brigham Hospital, 721 Huntington Avenue, Boston, Massachusetts 02115.

abnormalities such as atrophy or edema of the spinal cord or obstruction of cerebrospinal fluid pathways. When air is used as a contrast medium during pneumoencephalography in man, the introduction of 70-75 per cent N<sub>2</sub>O into the inspired anesthetic mixture can lead to more than a doubling of the subarachnoid pressure.<sup>1</sup> However, data on the behavior of air introduced into the cerebral ventricles cannot be assumed to apply to O<sub>2</sub> confined to the spinal subarachnoid space. Therefore, we have examined some aspects of the transfer of N<sub>2</sub>O from blood into

SUBJECT NO. 3  
N<sub>2</sub>O ANESTHESIA; CERVICAL

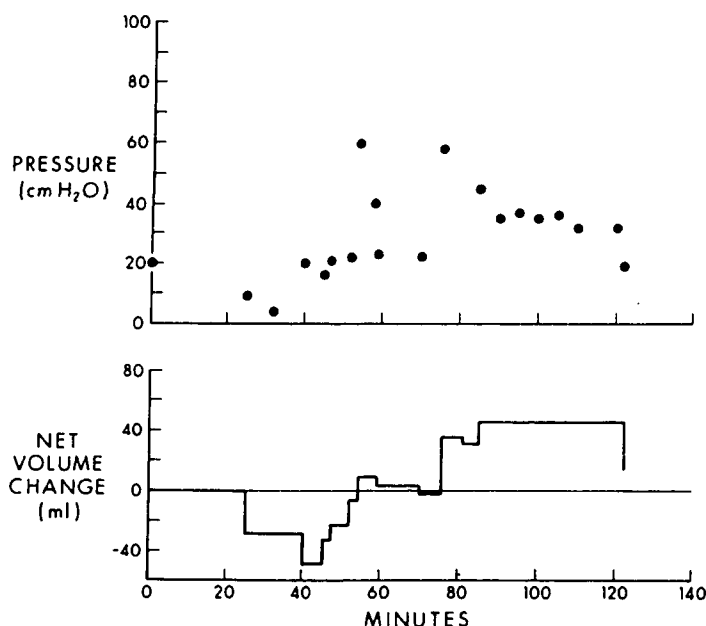

SUBJECT NO. 4  
N<sub>2</sub>O ANESTHESIA; CERVICAL

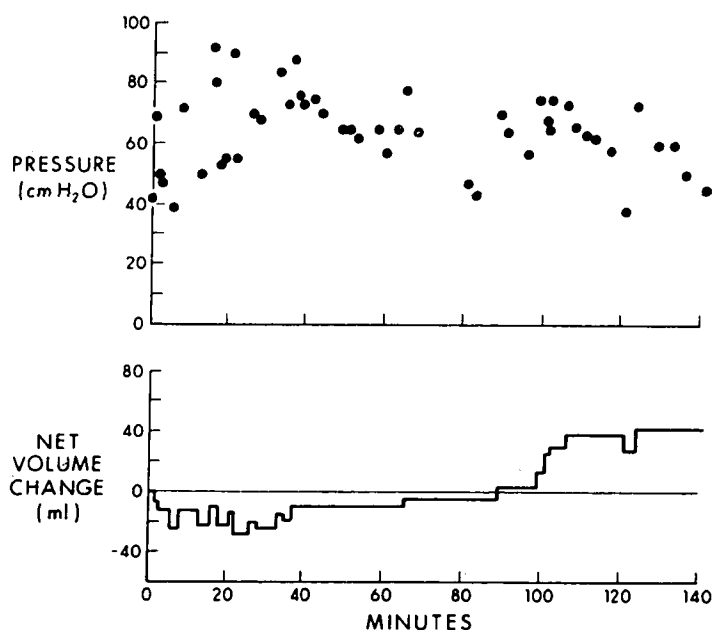

FIG. 1. Subarachnoid pressures measured during gas myelography in three patients, along with net changes in subarachnoid volume associated with withdrawal of cerebrospinal fluid and injection of oxygen. Anesthetic technique and site of subarachnoid puncture are indicated.

SUBJECT NO. 7  
LOCAL ANESTHESIA; LUMBAR

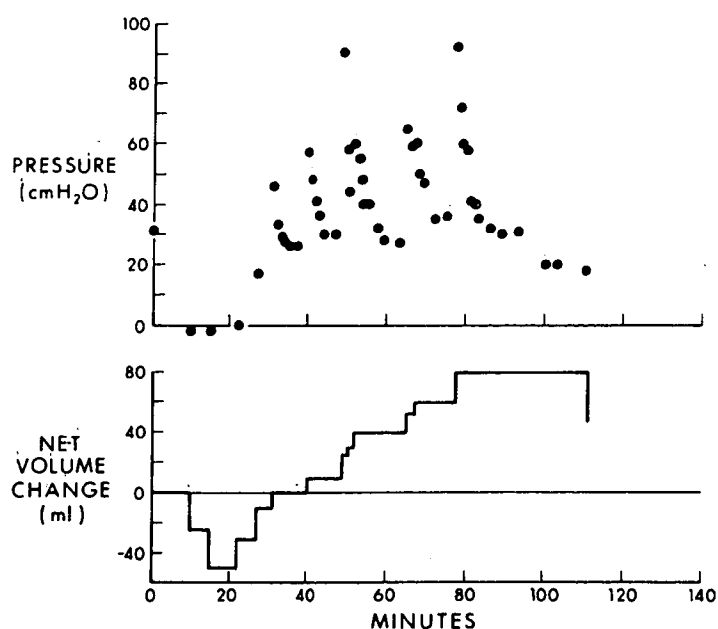

the subarachnoid O<sub>2</sub> bubble during gas myelography in man and have found that, despite substantial gas transfer, subarachnoid pressures appear to be determined predominantly by the pattern of injection and volume of O<sub>2</sub> introduced into the subarachnoid space.

# METHODS

We studied four men and four women, aged 18–74 years, while they were undergoing gas myelography, six during general and two during local anesthesia.

Approximately 60 per cent N<sub>2</sub>O formed part of each general anesthetic mixture. O<sub>2</sub> was administered by mask for 5 minutes before induction of anesthesia with thiopental and intubation of the trachea during neuromuscular blockade with succinylcholine. N<sub>2</sub>O in O<sub>2</sub> was then administered, 6:3 l/min during the first 15 min, 3:2 l/min for the remainder of the procedure. Two patients were given halothane, while four received morphine and pancuronium to supplement the N<sub>2</sub>O. Ventilation was manually controlled in all six patients who received general anesthesia. Those given

TABLE 1. Changes in Subarachnoid Gas Volumes

|                    | Age (Years),<br>Sex | Anesthetic<br>Agents                                   | Site of<br>Puncture | Volume CSF<br>Withdrawn<br>(ml) | Volume O <sub>2</sub><br>Injected<br>(ml ATPD*) | Time Gas in<br>Subarachnoid<br>Space<br>(Min) |
|--------------------|---------------------|--------------------------------------------------------|---------------------|---------------------------------|-------------------------------------------------|-----------------------------------------------|
| General anesthesia |                     |                                                        |                     |                                 |                                                 |                                               |
| Patient 1          | 57, F               | Thiopental<br>N <sub>2</sub> O<br>Halothane            | Lumbar              | 30                              | 55                                              | 100                                           |
| Patient 2          | 58, F               | Thiopental<br>N <sub>2</sub> O<br>Halothane            | Cervical            | 65                              | 70                                              | 115                                           |
| Patient 3          | 18, M               | Thiopental<br>N <sub>2</sub> O-morphine<br>Pancuronium | Cervical            | 48                              | 94                                              | 77                                            |
| Patient 4          | 55, F               | Thiopental<br>N <sub>2</sub> O-morphine<br>Pancuronium | Cervical            | 85                              | 127                                             | 133                                           |
| Patient 5          | 42, M               | Thiopental<br>N <sub>2</sub> O-morphine<br>Pancuronium | Cervical            | 89                              | 80                                              | 50                                            |
| Patient 6          | 74, M               | Thiopental<br>N <sub>2</sub> O-morphine<br>Pancuronium | Cervical            | 52                              | 54                                              | 53                                            |
| MEAN               |                     |                                                        |                     | 62                              | 80                                              | 88                                            |
| SD                 |                     |                                                        |                     | 23                              | 28                                              | 34                                            |
| Local anesthesia   |                     |                                                        |                     |                                 |                                                 |                                               |
| Patient 7          | 56, M               | Lidocaine                                              | Lumbar              | 50                              | 130                                             | 89                                            |
| Patient 8          | 69, F               | Lidocaine                                              | Cervical            | 108                             | 90                                              | 62                                            |
| MEAN               |                     |                                                        |                     | 79                              | 110                                             | 76                                            |

\* Ambient temperature and pressure, dry.

† Body temperature and pressure, saturated.

‡ He concentration measured by gas chromatography.

§ Estimated.

local anesthesia breathed air spontaneously during myelography.

After induction of general anesthesia, the patients were placed in the lateral position for subarachnoid puncture at the cervical (six patients) or lumbar level (two). After opening pressure was measured, 30–108 ml of cerebrospinal fluid (CSF) were withdrawn. Before injection of O<sub>2</sub>, the patient was positioned 15–30 degrees head-down to prohibit entry of gas into the cerebral ventricles. The O<sub>2</sub> was introduced in divided portions until the anatomic areas to be visualized radiographically were satisfactorily outlined by the gas.

In three of the patients given N<sub>2</sub>O anesthesia, myelography was performed using U.S.P. O<sub>2</sub> as the contrast medium. In the remaining five patients, with each patient's written informed consent, a gas mixture of 98.00 per cent O<sub>2</sub>, 1.63 per cent He, and 0.37 per cent N<sub>2</sub> was used. The inertness and relative insolubility of He in CSF made this a safe tracer whose dilution could indicate changes in mass of the subarachnoid gas.

During the myelography, we continuously meas-

ured CSF pressure through the indwelling spinal needle used to withdraw CSF and to inject O<sub>2</sub>. Zero reference for all CSF pressures was at the hub of the subarachnoid needle. Pressure was measured with a Sanborn strain gauge transducer (Model 268B), a Sanborn carrier preamplifier (Model 350-1100), and a direct-current voltmeter to measure output from the preamplifier. This system was calibrated with a water manometer prior to each study.

Upon completion of myelography, as much of the gas as possible was withdrawn from the subarachnoid space, usually 15–30 ml. Composition of this gas was analyzed in all but one case with a mass spectrometer (Perkin-Elmer MGA 1100A) that provided simultaneous readings of N<sub>2</sub>O, O<sub>2</sub>, CO<sub>2</sub>, N<sub>2</sub>, and He concentrations. Water vapor pressure in the bubble was assumed to be 47 torr, which, when divided by barometric pressure, gave an estimate of the fraction of water vapor in the subarachnoid gas. In one patient (Patient 8), only He concentration was measured by gas chromatography. The mass spectrometer was calibrated with gases of known concentration, ranging from zero to 100 per cent; intermediate mixtures were

## and Concentrations during Gas Myelography

| Final Subarachnoid Gas Composition (Vol Per Cent) |                |                |                  |                 |       |       | Calculated<br>Final Volume<br>of Gas<br>(ml BTPS†) | Percentage<br>Increase<br>in Volume<br>of Gas | Volume N <sub>2</sub> O<br>Added to<br>Bubble<br>(ml BTPS) | Volume O <sub>2</sub><br>Lost from<br>Bubble<br>(ml BTPS) |
|---------------------------------------------------|----------------|----------------|------------------|-----------------|-------|-------|----------------------------------------------------|-----------------------------------------------|------------------------------------------------------------|-----------------------------------------------------------|
| N <sub>2</sub> O                                  | O <sub>2</sub> | N <sub>2</sub> | H <sub>2</sub> O | CO <sub>2</sub> | He    | Total |                                                    |                                               |                                                            |                                                           |
| 44.5                                              | 42.8           | 2.5            | 6.2              | 3.8             | —     | 99.8  | —                                                  | —                                             | —                                                          | —                                                         |
| 54.7                                              | 31.6           | 1.9            | 6.2              | 5.8             | —     | 100.2 | —                                                  | —                                             | —                                                          | —                                                         |
| 44.5                                              | 37.5           | 5.6            | 6.2              | 5.8             | —     | 99.6  | —                                                  | —                                             | —                                                          | —                                                         |
| 40.8                                              | 40.8           | 1.2            | 6.2              | 9.8             | 0.82  | 99.6  | 252                                                | 98                                            | 103                                                        | 27                                                        |
| 40.2                                              | 37.6           | 8.9            | 6.2              | 5.4             | 0.70  | 99.0  | 187                                                | 134                                           | 75                                                         | 11                                                        |
| 42.4                                              | 39.4           | 6.5            | 6.2              | 4.8             | 0.75  | 100.1 | 116                                                | 115                                           | 49                                                         | 9                                                         |
| 44.5                                              | 38.3           | 4.4            | 6.2              | 5.9             | 0.76  | 99.7  | 185                                                | 116                                           | 76                                                         | 16                                                        |
| 5.3                                               | 3.8            | 3.0            | 0.0              | 2.1             | 0.06  | 0.4   | 68                                                 | 18                                            | 27                                                         | 10                                                        |
| 0.0                                               | 80.5           | 5.0            | 6.2              | 7.0             | 1.39  | 100.1 | 155                                                | 19                                            | —                                                          | 8                                                         |
| —                                                 | —              | —              | —                | —               | 1.51‡ | —     | 98                                                 | 9                                             | —                                                          | (6)§                                                      |
| —                                                 | —              | —              | —                | —               | 1.45  | —     | 127                                                | 14                                            | —                                                          | —                                                         |

analyzed by the method of Scholander.<sup>2</sup> Maximum expected error in spectrometric measurement of N<sub>2</sub>O, O<sub>2</sub>, CO<sub>2</sub>, and N<sub>2</sub> in our laboratory is 0.05 vol per cent. He concentration should have been accurate to within 0.01 vol per cent; therefore, errors in calculated gas volumes caused by limitations in measuring He concentration should have been less than  $\pm 1.4$  per cent.

Final volume of gas in the subarachnoid space was calculated from dilution of He. We corrected for He carried away by blood perfusing the spinal cord and for He lost through dissolving in and being carried away by bulk flow of CSF. It was assumed that the mean fraction of He lost into the blood or CSF was midway between the initial and final fractions of He in the gas bubble and that losses of subarachnoid He and O<sub>2</sub> into the blood were proportional to their effective solubilities in blood. The solubility of He in blood at 38 C is 0.0098 ml/ml,<sup>3</sup> which is about one-fifth the effective solubility of O<sub>2</sub> in venous blood already containing 15 vol per cent O<sub>2</sub> and capable of holding an additional 5 vol per cent, or 0.05 ml/ml.

In correcting for loss of He into CSF, we assumed

that He is equally soluble in CSF and water and that the CSF volume dissolving He is 150 ml (undoubtedly an overestimation). The rate of production and absorption (bulk flow) of CSF in normal man is 0.40 ml/min.<sup>4</sup> Therefore, the distribution volume for He in CSF would have been as much as 150 ml + 0.40 ml/min  $\times$  90 min = 186 ml during a typical myelographic study. Because the solubility of He in water is 0.0097 ml/ml at 38 C,<sup>3</sup> it follows that 186 ml CSF would contain 1.80 ml He when fully saturated at one atmosphere. The volume of dissolved He would increase by a factor of 800/760, according to Henry's law, to 1.90 ml at 800 torr, a realistic value for absolute subarachnoid pressure. To estimate the loss of He through CSF, 1.90 ml was multiplied by the average fraction of He in the gas bubble during myelography.

The following equation describes the dilution of He and loss of He through blood and CSF:

$$\begin{aligned}
 (\text{IFHe}) (\text{IVG}) &= (\text{FFHe}) (\text{FVG}) \\
 &+ (0.5) (\text{IFHe} + \text{FFHe}) (0.2) (\text{LVO}_2) \\
 &+ (0.5) (\text{IFHe} + \text{FFHe}) (1.90)
 \end{aligned} \quad (1)$$

where IFHe is initial fraction of He, IVG is initial

volume of gas, FFHe is final fraction of He, FVG is final volume of gas, and LVO<sub>2</sub> is lost volume of O<sub>2</sub>. The quantity (0.5) (IFHe + FFHe) represents the mean fraction of He in the gas bubble, while the factor (0.2) accounts for the fact that He is about one-fifth as soluble as O<sub>2</sub> in venous blood. Volume of O<sub>2</sub> lost from the subarachnoid bubble was calculated using the equation:

$$\text{LVO}_2 = (\text{IFO}_2)(\text{IVG}) - (\text{FFO}_2)(\text{FVG}) \quad (2)$$

where IFO<sub>2</sub> is initial fraction of O<sub>2</sub> and FFO<sub>2</sub> is final fraction of O<sub>2</sub>. Combining equations 1 and 2 and solving for FVG gives the equation used for calculating the final volume of gas in the subarachnoid bubble:

$$\text{FVG} = \frac{(\text{IVG})(\text{IFHe} - (0.1)(\text{IFHe} + \text{FFHe}) \times (\text{IFO}_2)) - (0.95)(\text{IFHe} + \text{FFHe})}{\text{FFHe} - (0.1)(\text{IFHe} + \text{FFHe})(\text{FFO}_2)} \quad (3)$$

Before carrying out calculations using equations 2 and 3, we multiplied the initial gas volume by the ratio of body to room temperature, each expressed in degrees Kelvin. This resulted in calculated gas volumes expressed under BTPS conditions. The increase in volume owing to saturation with water vapor was accounted for by dilution of He.

### RESULTS

We observed wide fluctuation in CSF pressure during gas myelography, whether the procedure was performed under general or local anesthesia. As can be seen in figure 1, pressure fell during withdrawal of CSF, sometimes to values below atmospheric pressure. Pressure usually returned to control levels as the volume of O<sub>2</sub> introduced approximated the volume of CSF removed. Thereafter, additional increments of O<sub>2</sub> frequently produced large elevations in pressure. Peak pressures seemed to be unrelated quantitatively to net changes in volume resulting from withdrawal of CSF or injection of O<sub>2</sub> (fig. 1). The data do not suggest any difference in peak or "average" pressures between patients breathing air and those breathing N<sub>2</sub>O:O<sub>2</sub>.

During gas myelography performed with general anesthesia using approximately 60 per cent N<sub>2</sub>O, volume of the subarachnoid gas bubble increased by  $116 \pm 18$  (SD) per cent. This more than doubling of volume resulted from diffusion of N<sub>2</sub>O, CO<sub>2</sub>, N<sub>2</sub>, and water vapor into the bubble, while a substantially smaller volume of O<sub>2</sub> diffused outward. Increase in temperature also contributed to the increase in volume. The concentration of N<sub>2</sub>O in gas withdrawn at the conclusion of myelography ( $44.5 \pm 5.3$  per cent) showed that N<sub>2</sub>O in the subarachnoid bubble was approximately 80 per cent equilibrated with the inspired N<sub>2</sub>O concentration ( $55.9 \pm 2.4$  per cent)

measured in three of the patients. N<sub>2</sub>O in the anesthetic gases contributed substantially ( $76 \pm 27$  ml) to the increase in mass of the bubble.

In contrast, when myelography was performed during breathing of air, the mass of gas in the subarachnoid bubble increased by only  $14 \pm 7$  per cent. The volume of CO<sub>2</sub>, N<sub>2</sub>, and water vapor that diffused into the gas bubble was only slightly greater than the volume of O<sub>2</sub> that diffused outward.

Table 1 gives details of each procedure, including final composition of the subarachnoid gas and calculated changes in volumes of gas in the subarachnoid bubble.

### DISCUSSION

The marked increase in subarachnoid pressure during pneumoencephalography with air as contrast medium with N<sub>2</sub>O anesthesia has been explained by Saidman and Eger as resulting from the high solubility of N<sub>2</sub>O in blood relative to that of N<sub>2</sub>.<sup>1</sup> The number of molecules of N<sub>2</sub>O transferred to the ventricular gas bubble exceeds the number of N<sub>2</sub> molecules leaving the bubble, and pressure rises. In contrast, we found during myelography with O<sub>2</sub> as the contrast medium that subarachnoid pressures with N<sub>2</sub>O anesthesia are not consistently higher than when air is inhaled. The reason for this does not seem to be that loss of O<sub>2</sub> from the subarachnoid bubble compensates for gain of N<sub>2</sub>O, because the percentage increase in volume of the bubble was clearly higher when patients breathed N<sub>2</sub>O:O<sub>2</sub> than when they breathed air (table 1).

Our finding that there were no consistent differences between subarachnoid pressures in patients breathing N<sub>2</sub>O:O<sub>2</sub> and those breathing air may be explained by the fact that the neuroradiologist was primarily concerned with the volume of subarachnoid gas and not with the amount of gas introduced. He injected increments of O<sub>2</sub>, monitoring progress with frequent radiographs, until the total volume of gas was just sufficient to outline subarachnoid structures. N<sub>2</sub>O entering the subarachnoid gas bubble simply contributed to adequacy of the gas volume for radiologic contrast. Mean volumes of O<sub>2</sub> injected into the subarachnoid space in the two groups of patients, 80 ml during N<sub>2</sub>O and 110 ml during local anesthesia, support this interpretation; the difference, however, is not statistically significant (table 1).

During subarachnoid injection of increments of O<sub>2</sub> during local anesthesia, patients often complained of severe headache, which the neuroradiologist used as a signal to stop injection. Complaint of headache was usually accompanied by a transient spike in subarachnoid pressure (fig. 1). When the pressure returned toward baseline, the headache subsided, and

the neuroradiologist felt free to inject additional  $O_2$ . During general anesthesia, this subjective indicator of potentially dangerous elevations in subarachnoid pressure does not exist. One spike of pressure during general anesthesia exceeded 130 cm  $H_2O$ . Therefore, it would seem advisable to monitor subarachnoid pressures continuously during gas myelography with general anesthesia, even though, according to our findings, the major source of potentially dangerous high pressure is not inhaled  $N_2O$ . Subarachnoid pressures should probably also be measured continuously during gas myelography with local anesthesia, because this would make possible, through controlled injection of  $O_2$ , the avoidance of subarachnoid pressures that produce pain.

Not only  $N_2O$  but also  $N_2$  and  $CO_2$  diffuse into the subarachnoid bubble during gas myelography. The  $CO_2$  concentration of 7.0 per cent ( $P_{CO_2}$  53 torr) in the subarachnoid gas of Patient 7, who was spontaneously breathing air during local anesthesia, was within the range of normal  $P_{CO_2}$  in the CSF of normocapnic man.<sup>5</sup> Concentrations of  $CO_2$  in gas removed from the subarachnoid space of five of the six patients anesthetized with  $N_2O$ , ranging from 3.8 to 5.8 per cent ( $P_{CO_2}$  29 to 44 torr), would be expected during pulmonary hyperventilation. The  $CO_2$  concentration of 9.8 per cent ( $P_{CO_2}$  74 torr) in Patient 4, however, suggested respiratory acidosis. That patient, in fact, did have compensated congestive heart failure and chronic restrictive pulmonary disease with pleural effusion, and showed evidence of respiratory distress

when permitted to breathe spontaneously at the conclusion of myelography. At that time,  $Pa_{CO_2}$  was 49 torr,  $pH_a$  7.33.

Although we have shown substantial transfer of gas from CSF or blood into the subarachnoid bubble during gas myelography with  $N_2O$  anesthesia, major changes in subarachnoid pressure appear to be related to the pattern of injection and volume of  $O_2$  introduced into the subarachnoid space by the neuroradiologist.

The authors thank Leroy D. Vandam, M.D., for suggesting this study; Ying-Kan Tien, M.D., for recommending use of He as a tracer; Richard B. Weiskopf, M.D., George Volpe, William Burgess, Ph.D., and Otto Grübner, Ph.D., for assisting in gas analysis; and Arthur E. Rosenbaum, M.D., and Richard A. Baker, M.D., for making their neuroradiological patients available for study.

This study was approved by the Human Subjects Committee of Peter Bent Brigham Hospital.

#### REFERENCES

1. Saidman LJ, Eger EI II: Change in cerebrospinal fluid pressure during pneumoencephalography under nitrous oxide anesthesia. *ANESTHESIOLOGY* 26:67-72, 1965
2. Scholander PF: Analyzer for accurate estimation of respiratory gases in one-half cubic centimeter samples. *J Biol Chem* 167:235-250, 1947
3. Hawkins JA, Shilling CW: Helium solubility in blood at increased pressures. *J Biol Chem* 113:649-653, 1936
4. Rubin RC, Henderson ES, Ommaya AK, et al: The production of cerebrospinal fluid in man and its modification by acetazolamide. *J Neurosurg* 25:430-436, 1966
5. van Heisst ANP, Maas AHJ, Visser BF: Comparison of acid-base balance in cisternal and lumbar cerebrospinal fluid. *Pflügers Arch* 287:242-246, 1966

Anesthesiology  
48:219-221, 1978

### Supraclavicular Subcutaneous Emphysema Following Lumbar Epidural Anesthesia

EDWARD N. LAMAN, LCDR, MC, USNR,\* AND CHARLES H. McLESKEY, LCDR, MC, USNR†

Epidural anesthesia via the lumbar or sacral approach is widely used for surgical and obstetrical procedures. Although the technique of lumbar epidural anesthesia is relatively simple, problems of epidural space identification<sup>1</sup> and catheter placement<sup>2</sup> arise. This paper reports a case in which subcutaneous emphysema was present in the cervical and supraclavicular regions of a parturient in labor, six hours after lumbar epidural catheter insertion.

\* Resident.

† Attending Staff.

Received from the Department of Anesthesiology, Naval Regional Medical Center, Oakland, California 94627. Accepted for publication September 3, 1977. This work was performed at the Naval Regional Medical Center, Oakland, California, without grant support. It was presented at the Western Anesthesia Residents Research Conference, May 1977, Seattle, Washington.

Address reprint requests to Dr. Laman.

#### REPORT OF A CASE

A healthy 25-year-old, 70-kg, 165-cm woman, gravida 3, para 2, was admitted to the obstetrical ward in active labor after an uncomplicated 40-week pregnancy. Previous deliveries had been accomplished with local anesthesia. The cardiovascular, pulmonary, musculoskeletal, and neurologic systems review disclosed no abnormality. Results of cardiac and pulmonary examinations were normal, with a supine blood pressure of 120/60 torr and a regular pulse of 72/min. Vertebral landmarks were adequate. The cervix was dilated 4.5 cm and completely effaced. Hematocrit was 32 per cent; urine and chest x-ray were normal.

Lumbar epidural anesthesia was elected and the patient was placed in the left lateral decubitus position and prepped with tincture of benzalkonium chloride (Zephiran). After infiltration of the skin with 1 per cent lidocaine, many attempts at identification of the epidural space were made midline at the L3-4 and L4-5 interspaces with an 18-gauge Tuohy needle, using the technique of loss of resistance to injected air. An estimated total of 30-40 ml of air was injected prior to satisfactorily locating the epidural space. No blood, cerebrospinal fluid, or air was obtained on aspiration.
